# Supplementary material for: Pendred Syndrome, or Not Pendred Syndrome? That Is the Question
Source: MDPI journal article supplement (doi:10.3390/genes12101569), 2021-10-01
Supplement: s1 [file s1]

**Table S1: Patients' hearing thresholds.** Hearing thresholds (expressed in dB) at different frequencies (expressed in Hertz) of the right and left ear are reported for each patient. (NA=not available)

| Patient | Classification | Right ear |        |        |        |        |        | Left ear |        |        |        |        |        |
|---------|----------------|-----------|--------|--------|--------|--------|--------|----------|--------|--------|--------|--------|--------|
|         |                | 250 Hz    | 500 Hz | 1 kHz  | 2 kHz  | 4 kHz  | 8 kHz  | 250 Hz   | 500 Hz | 1 kHz  | 2 kHz  | 4 kHz  | 8 kHz  |
| ID1     | M2             | 100 dB    | 115 dB | 115 dB | 125 dB | 125 dB | 125 dB | 80 dB    | 100 dB | 95 dB  | 105 dB | 110 dB | 125 dB |
| ID2     | M2             | 120 dB    | 120 dB | 120 dB | 120 dB | 120 dB | 120 dB | 115 dB   | 125 dB | 125 dB | 125 dB | 125 dB | 125 dB |
| ID12    | M2             | 40 dB     | 45 dB  | 45 dB  | 65 dB  | 90 dB  | 110 dB | 55 dB    | 70 dB  | 80 dB  | 100 dB | 120 dB | 120 dB |
| ID19    | M2             | 120 dB    | 120 dB | 120 dB | 120 dB | 120 dB | 120 dB | 110 dB   | 110 dB | 110 dB | 110 dB | 110 dB | 110 dB |
| ID22    | M2             | 35 dB     | 40 dB  | 65 dB  | 65 dB  | 100 dB | 120 dB | 65 dB    | 70 dB  | 80 dB  | 70 dB  | 80 dB  | 100 dB |
| ID7     | M1             | 50 dB     | 55 dB  | 50 dB  | 50 dB  | 55 dB  | 60 dB  | 50 dB    | 50 dB  | 50 dB  | 40 dB  | 45 dB  | 40 dB  |
| ID10    | M1             | 30 dB     | 30 dB  | 50 dB  | 70 dB  | 70 dB  | 100 dB | 122 dB   | 122 dB | 122 dB | 122 dB | 122 dB | 122 dB |
| ID14    | M1             | 125 dB    | 125 dB | 125 dB | 125 dB | 125 dB | 125 dB | 125 dB   | 125 dB | 125 dB | 125 dB | 125 dB | 125 dB |
| ID17    | M1             | 35 dB     | 50 dB  | 50 dB  | 60 dB  | 50 dB  | 60 dB  | 45 dB    | 60 dB  | 70 dB  | 90 dB  | 100 dB | 120 dB |
| ID18    | M1             | 80 dB     | 95 dB  | 95 dB  | 105 dB | 105 dB | 120 dB | 85 dB    | 90 dB  | 90 dB  | 100 dB | 110 dB | 120 dB |
| ID3     | M0             | 30 dB     | 35 dB  | 35 dB  | 55 dB  | 50 dB  | 60 dB  | 100 dB   | 120 dB | 120 dB | 120 dB | 120 dB | 120 dB |
| ID4     | M0             | 30 dB     | 45 dB  | 40 dB  | 40 dB  | 35 dB  | 20 dB  | 30 dB    | 45 dB  | 40 dB  | 40 dB  | 35 dB  | 20 dB  |
| ID5     | M0             | 45 dB     | 45 dB  | 50 dB  | 55 dB  | 40 dB  | 60 dB  | 75 dB    | 70 dB  | 75 dB  | 65 dB  | 120 dB | 120 dB |
| ID6     | M0             | 45 dB     | 45 dB  | 20 dB  | 15 dB  | 20 dB  | 35 dB  | 55 dB    | 50 dB  | 60 dB  | 80 dB  | 75 dB  | 105 dB |
| ID8     | M0             | 30 dB     | 25 dB  | 20 dB  | 30 dB  | 100 dB | 105 dB | 25 dB    | 25 dB  | 20 dB  | 50 dB  | 95 dB  | 105 dB |
| ID9     | M0             | 40 dB     | 50 dB  | 40 dB  | 30 dB  | 25 dB  | 25 dB  | 90 dB    | 90 dB  | 85 dB  | 70 dB  | 75 dB  | 75 dB  |
| ID11    | M0             | 55 dB     | 70 dB  | 105 dB | 105 dB | 110 dB | 120 dB | 55 dB    | 60 dB  | 60 dB  | 60 dB  | 50 dB  | 55 dB  |
| ID13    | M0             | 80 dB     | 75 dB  | 70 dB  | 75 dB  | 75 dB  | 70 dB  | 75 dB    | 85 dB  | 95 dB  | 90 dB  | 100 dB | 120 dB |
| ID15    | M0             | 70 dB     | 75 dB  | 90 dB  | 85 dB  | 80 dB  | 120 dB | 35 dB    | 45 dB  | 45 dB  | 35 dB  | 30 dB  | 50 dB  |
| ID16    | M0             | 60 dB     | 65 dB  | 60 dB  | 70 dB  | 60 dB  | 60 dB  | 55 dB    | 65 dB  | 65 dB  | 70 dB  | 65 dB  | 60 dB  |
| ID20    | M0             | 25 dB     | 30 dB  | 40 dB  | 60 dB  | 75 dB  | 80 dB  | 25 dB    | 25 dB  | 25 dB  | 20 dB  | 55 dB  | 55 dB  |
| ID21    | M0             | 50 dB     | 40 dB  | 35 dB  | 65 dB  | 85 dB  | 105 dB | 30 dB    | 30 dB  | 20 dB  | 25 dB  | 55 dB  | 90 dB  |
| ID23    | M0             | 75 dB     | 75 dB  | 90 dB  | 85 dB  | 90 dB  | NA     | 80 dB    | 90 dB  | 95 dB  | 95 dB  | 95 dB  | NA     |
| ID24    | M0             | 85 dB     | 90 dB  | 95 dB  | 95 dB  | 85 dB  | 120 dB | 90 dB    | 100 dB | 110 dB | 120 dB | 120 dB | 120 dB |

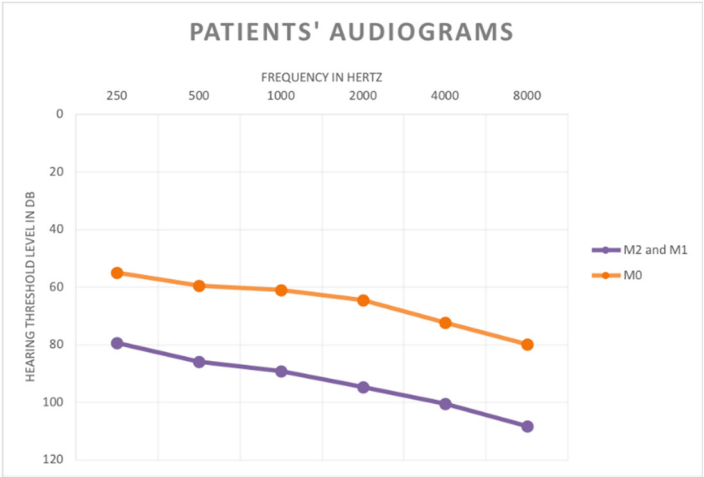

**Figure S1: Mean audiometric pattern of carriers and non-carriers of pathogenic alleles.** Comparison of the hearing threshold mean values at different frequencies between carriers of *SLC26A4* mutation (M2 and M1, purple line) and non carriers (orange line).
